# Supplementary material
Source: PubMed Central journal article supplement (PMC3667555)
Supplement: NIHMS461321-supplement-1_si_001.pdf [file NIHMS461321-supplement-1_si_001.pdf]

# SUPPORTING INFORMATION

For the Manuscript Entitled

## **“Evaluation of K(HYNIC)<sub>2</sub> as A Bifunctional Chelator for <sup>99m</sup>Tc-Labeling of Small Biomolecules”**

**by**

Shundong Ji, Yang Zhou, Guoqiang Shao and Shuang Liu\*

School of Health Sciences, Purdue University, West Lafayette, Indiana, USA

RUNNING TITLE: <sup>99m</sup>Tc-labeled cyclic RGD dimers for tumor imaging

---

\*Correspondence should be addressed to:

Dr. Shuang Liu  
School of Health Sciences  
Purdue University  
550 Stadium Mall Drive  
West Lafayette, IN 47907  
Phone: 765-494-0236  
Fax 765-496-1377  
Email: [liu100@purdue.edu](mailto:liu100@purdue.edu)

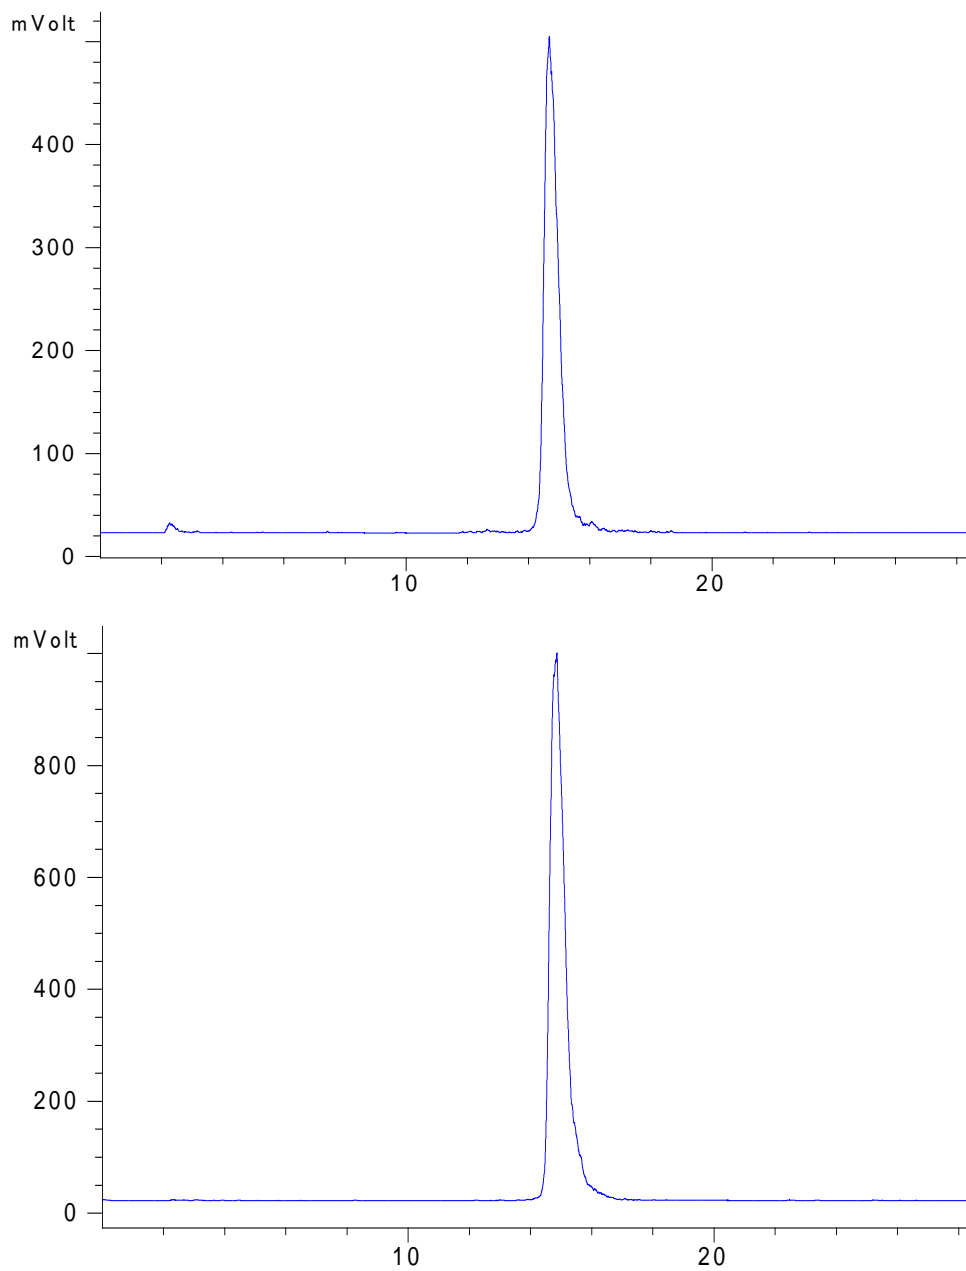

Figure SI1. Radio-HPLC chromatograms of **4** at 1 and 6 hour post-labeling. Complex **4** was stored in the kit solution at room temperature. Complexes **1 – 3** also showed similar solution stability.
